# Supplementary material for: Qualitative analysis of visual risk communication on twitter during the Covid-19 pandemic
Source: Springer Nature journal article supplement (doi:10.1186/s12889-021-10851-4), 2021-04-28
Supplement: MOESM1 [file 19114418]

# Qualitative Analysis of Visual Risk Communication on Twitter during the Covid-19 Pandemic

Joanna Sleigh, Julia Amann, Manuel Schneider, Effy Vayena

## Additional file 1

**Table S1.** Summary of Tweet Locations

| Countries                | Total |
|--------------------------|-------|
| United States of America | 268   |
| India                    | 108   |
| United Kingdom           | 64    |
| Switzerland              | 32    |
| Philippines              | 27    |
| China                    | 21    |
| (Unknown)                | 11    |
| South Korea              | 10    |
| Nigeria                  | 8     |
| Malaysia                 | 7     |
| Ireland                  | 6     |
| Russia                   | 6     |
| Australia                | 6     |
| Thailand                 | 5     |
| South Africa             | 4     |
| New Zealand              | 4     |
| Canada                   | 4     |
| Qatar                    | 4     |
| France                   | 3     |
| Japan                    | 2     |
| Singapore                | 2     |
| Germany                  | 1     |
| Jordan                   | 1     |
| Uganda                   | 1     |
| Italy                    | 1     |
| Belgium                  | 1     |
| Rwanda                   | 1     |
| Indonesia                | 1     |
| Saudi Arabia             | 1     |
| United Arab Emirates     | 1     |
| Norway                   | 1     |
| Kenya                    | 1     |
| Maldives                 | 1     |
| Israel                   | 1     |
| Republic of Congo        | 1     |

# Qualitative Analysis of Visual Risk Communication on Twitter during the Covid-19 Pandemic

Joanna Sleigh, Julia Amann, Manuel Schneider, Effy Vayena

**Table S2.A Spread per Stakeholder / Source**

|       | Health or Gov | Media | Other | Individual | Private Sector |
|-------|---------------|-------|-------|------------|----------------|
| count | 101           | 169   | 24    | 316        | 6              |
| mean  | 1.29%         | 1.59% | 8.12% | 10.02%     | 0.55%          |
| std   | 2.76%         | 5.83% | 8.05% | 37.06%     | 0.59%          |

**Table S2.B Spread per Graphic Type**

|       | Composite | Diagram | Graph | Illustrations | Model | Photograph | Symbol |
|-------|-----------|---------|-------|---------------|-------|------------|--------|
| count | 78        | 21      | 28    | 139           | 16    | 397        | 316    |
| mean  | 2.96%     | 7.56%   | 2.04% | 3.37%         | 3.28% | 7.46%      | 2.93%  |
| std   | 7.69%     | 13.91%  | 5.06% | 9.83%         | 8.39% | 33.01%     | 11.8%  |

**Table S2.C Spread per Covid-19 Action**

|       | Avoid touching face | Dab to sneeze | Get medical help | Social Distancing | Other  | Wash hands | Wear Masks | Stay Home |
|-------|---------------------|---------------|------------------|-------------------|--------|------------|------------|-----------|
| count | 29                  | 48            | 55               | 237               | 104    | 150        | 245        | 246       |
| mean  | 2.59%               | 1.35%         | 3.78%            | 4.41%             | 4.02%  | 4.09%      | 2.99%      | 9.44%     |
| std   | 7.3%                | 3.28%         | 12.37%           | 22.87%            | 11.47% | 24.17%     | 16.05%     | 37.36%    |

**Table S2.D Spread per Covid-19 Focus**

|       | Detection | Impact | Other | Prevention | Treatment |
|-------|-----------|--------|-------|------------|-----------|
| count | 145       | 170    | 7     | 616        | 45        |
| mean  | 2.96%     | 8.89%  | 4.16% | 6.11%      | 7.63%     |
| std   | 9.17%     | 38.96% | 6.84% | 27.09%     | 38.69%    |

**Table S2.E Spread per Message Framing**

|       | Health Gain | Health Loss | Non Applicable |
|-------|-------------|-------------|----------------|
| count | 200         | 260         | 187            |
| mean  | 6.62%       | 3.29%       | 9.16%          |
| std   | 28.32%      | 8.06%       | 38.41%         |

**Table S2.F Spread per Message Tone**

|       | Entertainment | Criticism | Gratitude |
|-------|---------------|-----------|-----------|
| count | 68            | 202       | 40        |
| mean  | 5.81%         | 8.26%     | 13.56%    |
| std   | 20.83%        | 23.83%    | 67.49%    |

# Qualitative Analysis of Visual Risk Communication on Twitter during the Covid-19 Pandemic

Joanna Sleigh, Julia Amann, Manuel Schneider, Effy Vayena

**Table S3.A** Graphic types communicated individually

| What          | Total | Percent |
|---------------|-------|---------|
| Composite     | 2     | 0.80%   |
| Diagram       | 5     | 1.90%   |
| Graph         | 17    | 6.50%   |
| Illustrations | 29    | 11.10%  |
| Models        | 2     | 0.80%   |
| Photograph    | 181   | 69.30%  |
| Symbol        | 25    | 9.60%   |

**Table S3.B** Graphic types combined

| What                | Total | Percent |
|---------------------|-------|---------|
| Zero graphic types  | 16    | 2.60%   |
| One graphic type    | 261   | 42.40%  |
| two graphic types   | 296   | 48.10%  |
| three graphic types | 32    | 5.20%   |
| four graphic types  | 10    | 1.60%   |
| five graphic types  | 1     | 0.20%   |

**Table S3.C** Normed edges of combined graphic types

| From                                   | To                                     | Weight     |
|----------------------------------------|----------------------------------------|------------|
| Diagram: process, flow of results...   | Composite Graphics (multiple-images)   | 0.01511879 |
| Graph: show quantitative relationships | Composite Graphics (multiple-images)   | 0.00647948 |
| Graph: show quantitative relationships | Diagram: process, flow of results...   | 0.00215983 |
| Illustrations or rendered pictures     | Composite Graphics (multiple-images)   | 0.06479482 |
| Illustrations or rendered pictures     | Diagram: process, flow of results...   | 0.01511879 |
| Illustrations or rendered pictures     | Graph: show quantitative relationships | 0.00215983 |
| Models (such as 3d)                    | Composite Graphics (multiple-images)   | 0.01727862 |
| Models (such as 3d)                    | Diagram: process, flow of results...   | 0          |
| Models (such as 3d)                    | Graph: show quantitative relationships | 0          |
| Models (such as 3d)                    | Illustrations or rendered pictures     | 0.01943844 |
| Photograph                             | Composite Graphics (multiple-images)   | 0.08855292 |
| Photograph                             | Diagram: process, flow of results...   | 0.00647948 |
| Photograph                             | Graph: show quantitative relationships | 0.00215983 |
| Photograph                             | Illustrations or rendered pictures     | 0.01511879 |
| Photograph                             | Models (such as 3d)                    | 0.00647948 |
| Symbol: pictographic or abstract       | Composite Graphics (multiple-images)   | 0.06911447 |
| Symbol: pictographic or abstract       | Diagram: process, flow of results...   | 0.02807775 |
| Symbol: pictographic or abstract       | Graph: show quantitative relationships | 0.01511879 |
| Symbol: pictographic or abstract       | Illustrations or rendered pictures     | 0.21814255 |
| Symbol: pictographic or abstract       | Models (such as 3d)                    | 0.02591793 |
| Symbol: pictographic or abstract       | Photograph                             | 0.38228942 |

# Qualitative Analysis of Visual Risk Communication on Twitter during the Covid-19 Pandemic

Joanna Sleigh, Julia Amann, Manuel Schneider, Effy Vayena

**Table S4.A** Covid-19 topics communicated individually, aside from prevention

| What      | Total |
|-----------|-------|
| Detection | 45    |
| Impact    | 170   |
| Other     | 0     |
| Treatment | 2     |
| None      | 341   |

**Table S4.B** Covid-19 topics combined

| What         | Total |
|--------------|-------|
| One topic    | 341   |
| Two topics   | 205   |
| Three topics | 48    |
| Four topics  | 22    |

**Table S5.A** Covid-19 measures communicated individually

| Intent           | Sum | Total  |
|------------------|-----|--------|
| Wear a mask      | 113 | 33.00% |
| Avoid touching   | 1   | 0.30%  |
| sneezing         | 3   | 0.90%  |
| Wash hands       | 30  | 8.80%  |
| Social distance  | 37  | 10.80% |
| Stay home        | 145 | 42.40% |
| Get medical help | 9   | 2.60%  |
| Other            | 4   | 1.20%  |

**Table S5.B** Overall frequency of Covid-19 measures

| What             | Total |
|------------------|-------|
| Wear a mask      | 245   |
| Avoid touching   | 29    |
| sneezing         | 48    |
| Wash hands       | 150   |
| Social distance  | 237   |
| Stay home        | 246   |
| Get medical help | 55    |
| Other            | 104   |

**Table S5.C** Covid-19 measures combined

| Number combined | Total | Percent |
|-----------------|-------|---------|
| one             | 342   | 55.50%  |
| two             | 139   | 22.60%  |
| three           | 74    | 12.00%  |
| four            | 42    | 6.80%   |

## Qualitative Analysis of Visual Risk Communication on Twitter during the Covid-19 Pandemic

Joanna Sleight, Julia Amann, Manuel Schneider, Effy Vayena

|       |    |       |
|-------|----|-------|
| five  | 12 | 1.90% |
| six   | 5  | 0.80% |
| seven | 2  | 0.30% |

**Table S5.D** Normed edges of combined Covid-19 measures

| From                                              | To                                                | Weight     |
|---------------------------------------------------|---------------------------------------------------|------------|
| Cover mouth & nose when sneezing                  | Avoid touching mouth and eyes                     | 0.02       |
| Get medical help w. symptoms (call - don't go in) | Avoid touching mouth and eyes                     | 0.01294118 |
| Get medical help w. symptoms (call - don't go in) | Cover mouth & nose when sneezing                  | 0.00823529 |
| Keep distance                                     | Avoid touching mouth and eyes                     | 0.02941176 |
| Keep distance                                     | Cover mouth & nose when sneezing                  | 0.04588235 |
| Keep distance                                     | Get medical help w. symptoms (call - don't go in) | 0.02941176 |
| Other                                             | Avoid touching mouth and eyes                     | 0.01647059 |
| Other                                             | Cover mouth & nose when sneezing                  | 0.04       |
| Other                                             | Get medical help w. symptoms (call - don't go in) | 0.02470588 |
| Other                                             | Keep distance                                     | 0.07058824 |
| Wash hands                                        | Avoid touching mouth and eyes                     | 0.03176471 |
| Wash hands                                        | Cover mouth & nose when sneezing                  | 0.05294118 |
| Wash hands                                        | Get medical help w. symptoms (call - don't go in) | 0.01882353 |
| Wash hands                                        | Keep distance                                     | 0.11176471 |
| Wash hands                                        | Other                                             | 0.06235294 |
| Wear a mask                                       | Avoid touching mouth and eyes                     | 0.00470588 |
| Wear a mask                                       | Cover mouth & nose when sneezing                  | 0.00352941 |
| Wear a mask                                       | Get medical help w. symptoms (call - don't go in) | 0.01411765 |
| Wear a mask                                       | Keep distance                                     | 0.10588235 |
| Wear a mask                                       | Other                                             | 0.03294118 |
| Wear a mask                                       | Wash hands                                        | 0.05529412 |
| Work from home                                    | Avoid touching mouth and eyes                     | 0.00705882 |
| Work from home                                    | Cover mouth & nose when sneezing                  | 0.00823529 |
| Work from home                                    | Get medical help w. symptoms (call - don't go in) | 0.01882353 |
| Work from home                                    | Keep distance                                     | 0.08235294 |
| Work from home                                    | Other                                             | 0.02588235 |
| Work from home                                    | Wash hands                                        | 0.02941176 |
| Work from home                                    | Wear a mask                                       | 0.03647059 |

**Table S6.A** Number of tweets with framing

| Framing          | Total | Percent |
|------------------|-------|---------|
| Health Gain      | 169   | 27.40%  |
| Health Loss      | 229   | 37%     |
| Both Gain & Loss | 31    | 5%      |
| Neither          | 187   | 30.60%  |

**Table S6.B** Framing used from January until October 2020

| Month | Only Health Gain | Only Health Loss | Both Gain & Loss | Neither | Total |
|-------|------------------|------------------|------------------|---------|-------|
| Jan   | 20               | 36               | 7                | 27      | 90    |
| Feb   | 11               | 15               | 3                | 19      | 48    |

## Qualitative Analysis of Visual Risk Communication on Twitter during the Covid-19 Pandemic

Joanna Sleigh, Julia Amann, Manuel Schneider, Effy Vayena

|     |    |    |   |    |     |
|-----|----|----|---|----|-----|
| Mar | 29 | 29 | 4 | 41 | 103 |
| Apr | 18 | 20 | 4 | 12 | 54  |
| May | 18 | 10 | 0 | 8  | 36  |
| Jun | 16 | 9  | 0 | 6  | 31  |
| Jul | 12 | 34 | 4 | 24 | 74  |
| Aug | 19 | 46 | 3 | 37 | 105 |
| Sep | 19 | 5  | 5 | 7  | 36  |
| Oct | 6  | 25 | 1 | 7  | 39  |

**Table S7.A** Different tones present in the Tweets

| What          | Total | Percent |
|---------------|-------|---------|
| Combination   | 9     | 1.50%   |
| Criticism     | 198   | 32.10%  |
| Entertainment | 62    | 10.10%  |
| Gratitude     | 32    | 5.20%   |
| None          | 315   | 51.10%  |

**Table S7.B** Tones from January until October 2020

| Month | Combination | Criticism | Entertainment | Gratitude | None | Total |
|-------|-------------|-----------|---------------|-----------|------|-------|
| Jan   | 2           | 2         | 8             | 6         | 72   | 90    |
| Feb   | 1           | 7         | 4             | 3         | 33   | 48    |
| Mar   | 2           | 11        | 11            | 7         | 72   | 103   |
| Apr   | 0           | 5         | 9             | 4         | 36   | 54    |
| May   | 3           | 9         | 8             | 4         | 12   | 36    |
| Jun   | 0           | 11        | 1             | 2         | 17   | 31    |
| Jul   | 1           | 32        | 9             | 2         | 30   | 74    |
| Aug   | 0           | 87        | 4             | 1         | 13   | 105   |
| Sep   | 0           | 12        | 4             | 2         | 18   | 36    |
| Oct   | 0           | 22        | 5             | 0         | 12   | 39    |

**Table S8.** Stakeholder presence from January until October 2020

| Month | Health / Gov | Individual | Media | Other | Private Sector | Total |
|-------|--------------|------------|-------|-------|----------------|-------|
| Jan   | 37           | 17         | 36    | 0     | 0              | 90    |
| Feb   | 13           | 15         | 19    | 1     | 0              | 48    |
| Mar   | 17           | 53         | 28    | 3     | 2              | 103   |
| Apr   | 5            | 26         | 18    | 1     | 4              | 54    |
| May   | 4            | 20         | 11    | 1     | 0              | 36    |
| Jun   | 6            | 21         | 4     | 0     | 0              | 31    |
| Jul   | 7            | 46         | 21    | 0     | 0              | 74    |
| Aug   | 4            | 68         | 15    | 18    | 0              | 105   |
| Sep   | 5            | 22         | 9     | 0     | 0              | 36    |
| Oct   | 3            | 28         | 8     | 0     | 0              | 39    |
